# Supplementary material for: Transcriptional Control of Honey Bee (Apis mellifera) Major Royal Jelly Proteins by 20-Hydroxyecdysone
Source: PubMed Central journal article supplement (PMC6163268; doi:10.3390/insects9030122), 2018-09-19
Supplement: insects-09-00122-s001.pdf [file insects-09-00122-s001.pdf]

**Supporting information:** Transcriptional control of honey bee (*Apis mellifera*) major royal jelly proteins by 20-hydroxyecdysone.

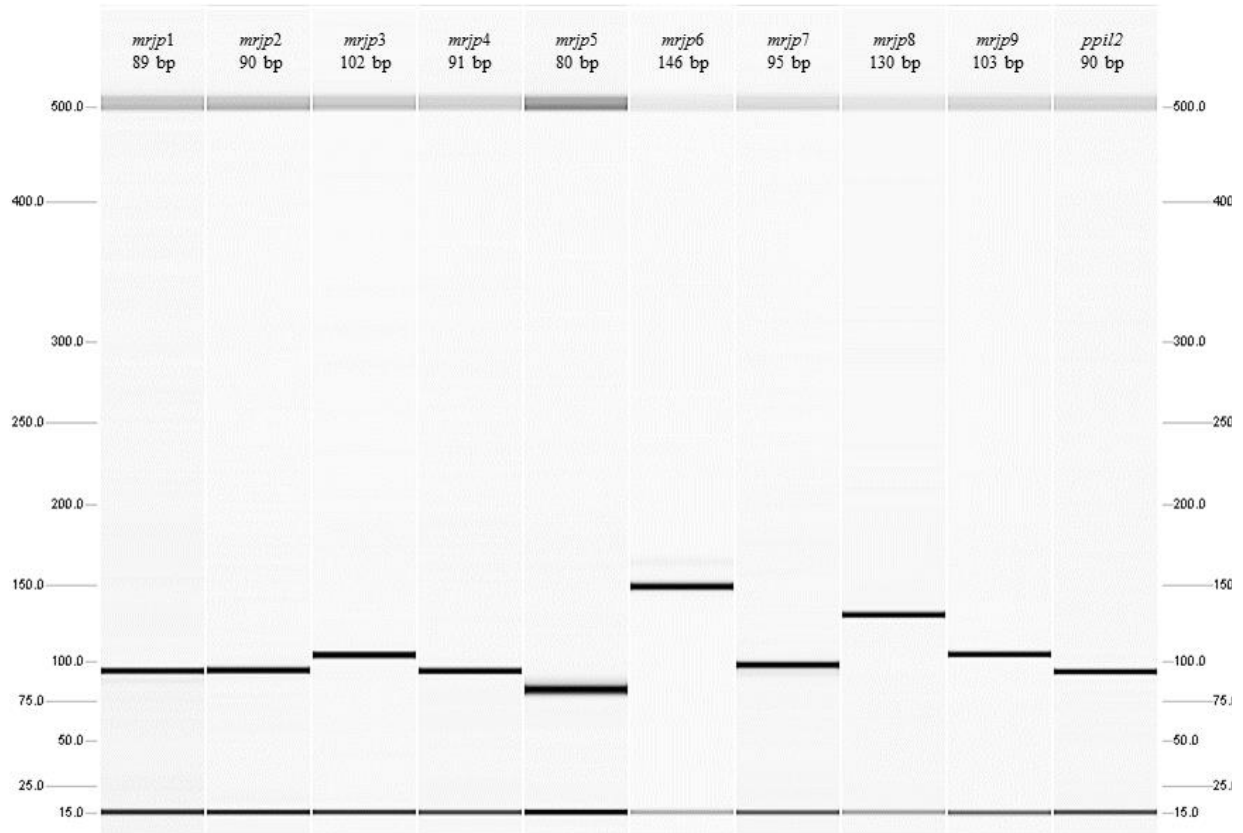

**Figure S1:** Analysis of qPCR product specificity.

**Table S1:** Primer and product characteristics for qPCR.

| Name         |   | Primer Sequence (5'-3')   | Size (bp) | Product T <sub>m</sub> (°C) | PCR efficiency | GenBank Gene ID | Reference              |
|--------------|---|---------------------------|-----------|-----------------------------|----------------|-----------------|------------------------|
| <i>mrjp1</i> | F | TGACATACATTACGAAGGAGTCCA  | 89        | 76.0                        | 1.95           | 406090          | Buttstedt et al., 2013 |
|              | R | ATCCGAAGAAGAGAACGCCA      |           |                             |                |                 |                        |
| <i>mrjp2</i> | F | CGTCCAATACCAAGGATCCGAA    | 90        | 77.5                        | 1.92           | 406091          |                        |
|              | R | ACAAGTCCGACGAAGAGGAC      |           |                             |                |                 |                        |
| <i>mrjp3</i> | F | TGGACAGATGGCGTGATAAGAC    | 102       | 76.5                        | 1.96           | 406121          |                        |
|              | R | GAGGTCCACCTTTGCCCTTT      |           |                             |                |                 |                        |
| <i>mrjp4</i> | F | AGACAAAATATCGATGTCGTAGCTC | 91        | 76.9                        | 1.98           | 406133          |                        |
|              | R | TGCCAGATTGTGGAACGTTTT     |           |                             |                |                 |                        |
| <i>mrjp5</i> | F | AGAAAATATGGATATGGTCGCTCAG | 80        | 76.5                        | 1.98           | 406116          |                        |
|              | R | ATTGTGGGAGATGCATCATTTTCA  |           |                             |                |                 |                        |
| <i>mrjp6</i> | F | ACAAAATATGGATATGGTCGCTCAG | 146       | 75.3                        | 1.91           | 406149          |                        |
|              | R | TCTGCATTCTGTTACTTAAAGCCAA |           |                             |                |                 |                        |
| <i>mrjp7</i> | F | AGAAAATACCGATATGGTCGCC    | 95        | 76.0                        | 1.98           | 409555          |                        |
|              | R | CAATAATGACGATATGTGGGAGCA  |           |                             |                |                 |                        |
| <i>mrjp8</i> | F | TGGACTCAAGCATCGGCTAA      | 130       | 78.5                        | 1.92           | 406067          |                        |
|              | R | TGGCAACCACTTCGATATTTCTT   |           |                             |                |                 |                        |
| <i>mrjp9</i> | F | TCGGAAACTGGTGCTCTCTT      | 103       | 80.0                        | 1.93           | 409873          |                        |
|              | R | TGGCGACTATTTCAATATTCCTTCT |           |                             |                |                 |                        |
| <i>ppil2</i> | F | TTTAATGCGGCACACTATTCTACT  | 90        | 77.7                        | 1.91           | 550966          | this study             |
|              | R | AACTGCTGCTTGATGTGTAGTTTC  |           |                             |                |                 |                        |

**Table S2:** Relative gene expression of all *mrjps* across both caged groups (control (C) and 20E (E)).

|      | <i>mrjp1</i> | <i>mrjp2</i> | <i>mrjp3</i> | <i>mrjp4</i> | <i>mrjp5</i> | <i>mrjp6</i> | <i>mrjp7</i> | <i>mrjp8</i> | <i>mrjp9</i> |
|------|--------------|--------------|--------------|--------------|--------------|--------------|--------------|--------------|--------------|
| C1-1 | 892.14       | 355.41       | 78.08        | 91.21        | 74.26        | 34.59        | 116.39       | 0.52         | 1.68         |
| C1-2 | 2033.02      | 695.39       | 171.84       | 189.70       | 116.12       | 33.79        | 218.00       | 0.49         | 1.24         |
| C1-3 | 2716.05      | 891.68       | 376.96       | 25.11        | 173.26       | 74.61        | 141.58       | 0.81         | 2.05         |
| C2-1 | 1086.47      | 434.07       | 77.78        | 118.68       | 76.32        | 35.13        | 104.34       | 0.46         | 1.87         |
| C2-2 | 1641.88      | 36.62        | 3.82         | 7.13         | 6.10         | 13.58        | 20.53        | 0.36         | 2.14         |
| C2-3 | 1743.97      | 520.83       | 78.60        | 140.86       | 64.27        | 28.87        | 130.93       | 0.51         | 2.44         |
| C3-1 | 1758.15      | 504.27       | 157.61       | 121.70       | 117.69       | 79.43        | 108.62       | 0.53         | 2.34         |
| C3-2 | 1039.27      | 375.17       | 94.12        | 77.65        | 46.60        | 26.07        | 82.22        | 0.39         | 1.60         |
| C3-3 | 2058.76      | 602.29       | 51.31        | 195.16       | 115.01       | 73.15        | 139.50       | 0.76         | 2.56         |
| E1-1 | 647.89       | 131.39       | 0.27         | 56.31        | 20.87        | 31.49        | 176.00       | 0.65         | 0.82         |
| E1-2 | 324.30       | 69.96        | 0.10         | 19.94        | 15.48        | 4.78         | 82.12        | 0.41         | 0.73         |
| E1-3 | 508.36       | 86.41        | 0.13         | 489.45       | 33.44        | 31.04        | 125.65       | 0.23         | 0.52         |
| E2-1 | 86.11        | 24.41        | 0.02         | 3.09         | 7.83         | 11.73        | 11.51        | 0.47         | 1.40         |
| E2-2 | 7.14         | 0.84         | 0.01         | 0.52         | 0.64         | 1.86         | 0.96         | 0.10         | 0.52         |
| E2-3 | 1018.36      | 244.05       | 3.33         | 50.61        | 20.78        | 36.46        | 84.02        | 0.37         | 1.08         |
| E3-1 | 740.46       | 197.95       | 19.97        | 40.94        | 24.24        | 29.89        | 60.54        | 0.27         | 1.99         |
| E3-2 | 543.99       | 124.26       | 15.93        | 29.12        | 15.42        | 24.27        | 50.34        | 0.39         | 0.95         |
| E3-3 | 1643.23      | 359.69       | 20.37        | 77.42        | 48.05        | 32.53        | 152.46       | 0.42         | 2.59         |

C, control cage 1 to 3; E, 20E cage 1 to 1. Per cage, three pools of three bees were analysed.

**Table S3:** Comparison of  $C_t$  values determined via qPCR between caged bees receiving pollen in their diet analysed in this study (control and 20E group) and hive nurses, hive foragers as well as caged bees not receiving pollen in their diet analysed in (Buttstedt *et al.*, 2013).  $C_t$  values of control bees in this study are always most similar to hive nurse bees in (Buttstedt *et al.*, 2013).

|                                    |                      | <i>mrjp1</i>   | <i>mrjp2</i>   | <i>mrjp3</i>   | <i>mrjp4</i>   | <i>mrjp5</i>   | <i>mrjp6</i>   | <i>mrjp7</i>   | <i>mrjp8</i>   | <i>mrjp9</i>   |
|------------------------------------|----------------------|----------------|----------------|----------------|----------------|----------------|----------------|----------------|----------------|----------------|
| $C_t$ values<br>(mean $\pm$<br>SD) | Control              | 12.2 $\pm$ 0.4 | 14.6 $\pm$ 1.3 | 16.5 $\pm$ 1.8 | 16.2 $\pm$ 1.6 | 16.5 $\pm$ 1.3 | 18.2 $\pm$ 0.7 | 15.8 $\pm$ 0.9 | 24.8 $\pm$ 0.4 | 22.6 $\pm$ 0.6 |
|                                    | 20E                  | 15.3 $\pm$ 2.5 | 18.0 $\pm$ 2.9 | 24.3 $\pm$ 4.7 | 18.6 $\pm$ 2.7 | 19.6 $\pm$ 1.9 | 20.3 $\pm$ 1.8 | 17.8 $\pm$ 2.3 | 26.3 $\pm$ 1.1 | 24.3 $\pm$ 1.4 |
|                                    | Workers <sub>c</sub> | 25.3 $\pm$ 0.2 | 28.6 $\pm$ 1.1 | 27.8 $\pm$ 1.5 | 24.5 $\pm$ 1.0 | 21.8 $\pm$ 0.9 | 20.9 $\pm$ 0.5 | 24.7 $\pm$ 0.4 | 23.3 $\pm$ 0.1 | 20.8 $\pm$ 0.7 |
|                                    | Nurses               | 12.4 $\pm$ 0.7 | 15.0 $\pm$ 1.0 | 15.5 $\pm$ 0.6 | 15.6 $\pm$ 0.7 | 16.7 $\pm$ 0.8 | 18.3 $\pm$ 0.2 | 15.8 $\pm$ 0.6 | 23.8 $\pm$ 0.6 | 22.5 $\pm$ 0.7 |
|                                    | Foragers             | 14.7 $\pm$ 1.3 | 18.4 $\pm$ 1.3 | 23.3 $\pm$ 1.5 | 20.7 $\pm$ 2.0 | 15.8 $\pm$ 1.2 | 15.0 $\pm$ 1.0 | 21.6 $\pm$ 1.3 | 22.8 $\pm$ 0.4 | 20.1 $\pm$ 0.2 |

$C_t$  values for caged workers (workers<sub>c</sub>) and nurses underlie the relative gene expression published in Buttstedt *et al.* (2013). A direct comparison of gene expression levels between Buttstedt *et al.* (2013) and this study was unfortunately not possible as different reference genes were used. However, in both studies 15 ng cDNA and the very same primers were used for qPCR and  $C_t$  values of the reference genes showed a standard deviation below 1 indicating an approximate comparability of determined  $C_t$  values.
